## REVIEW

# Exercise-induced adaptations to white and brown adipose tissue

Adam C. Lehnig and Kristin I. Stanford\*

## ABSTRACT

The beneficial effects of exercise on skeletal muscle and the cardiovascular system have long been known. Recent studies have focused on investigating the effects of exercise on adipose tissue and the effects that these exercise-induced adaptations have on overall metabolic health. Examination of exercise-induced adaptations in both white adipose tissue (WAT) and brown adipose tissue (BAT) has revealed marked differences in each tissue with exercise. In WAT, there are changes to both subcutaneous WAT (scWAT) and visceral WAT (vWAT), including decreased adipocyte size and lipid content, increased expression of metabolic genes, altered secretion of adipokines and increased mitochondrial activity. Adaptations specific to scWAT include lipidomic remodeling of phospholipids and, in rodents, the beiging of scWAT. The changes to BAT are less clear: studies evaluating the effect of exercise on the BAT of humans and rodents have revealed contradictory data, making this an important area of current investigation. In this Review, we discuss the exercise-induced changes to WAT and BAT that have been reported by different studies and highlight the current questions in this field.

**KEY WORDS:** Adipose tissue, Exercise, Metabolism

## Introduction

Exercise is an effective tool to combat obesity and type 2 diabetes (Crandall et al., 2008). The effects of exercise on improvements to both skeletal muscle metabolism and cardiovascular health have been well-established (Holloszy and Coyle, 1984; Myers, 2003) and, therefore, more recent studies have examined the role of exercise-induced adaptations to adipose tissue. In the past, adipose tissue was viewed primarily as a tissue involved in energy storage; however, recent investigations have revealed that the physiological role of adipose tissue is more complex and can be affected by many factors, including exercise.

There are three types of adipose tissue: white adipose tissue (WAT), brown adipose tissue (BAT) and beige adipose tissue. WAT is composed of white adipocytes and the stromal vascular fraction, which includes preadipocytes, mesenchymal stem cells and immune cells. White adipocytes have a unilocular fat droplet that contains triglycerides and comprises most of the cell volume. WAT has many functions, including energy storage in the form of lipids, hormone production and secretion, local tissue architecture and morphology, and immune functions (Tran and Kahn, 2010). WAT is located in many different depots throughout the human body and can be broadly subdivided into visceral WAT (vWAT), which is found around internal organs, and subcutaneous WAT (scWAT), which is found primarily around the thigh and buttocks. Visceral

WAT is associated with metabolic impairments (Wang et al., 2005; Carey et al., 1997), whereas scWAT has been linked to insulin sensitivity and a reduced risk of type 2 diabetes (Misra et al., 1997; Snijder et al., 2003). The two WAT depots have intrinsically different molecular characteristics that may account for the depot-specific metabolic properties. Among these, vWAT has a higher concentration of androgen receptors, lower levels of leptin secretion and leptin mRNA expression, a higher density of glucocorticoids, and higher levels of IL-6 secretion compared with scWAT (Ibrahim, 2010). These intrinsic depot differences may also play an important role in the effects of exercise on each specific depot.

Similar to humans, rodents have several WAT depots that can be divided into scWAT and vWAT. Rodents have two major scWAT depots: one is located anteriorly between the scapulae; the other scWAT depot, commonly referred to as the inguinal WAT (ingWAT), is located posteriorly, spreading from the dorsolumbar region to the gluteal region (Cinti, 2007). The rodent ingWAT is the most comparable depot to the major scWAT depot in humans in terms of location and, thus, is the most common scWAT depot studied in rodents. Furthermore, like humans, rodents also have several vWAT depots located around their internal organs. The largest and most accessible of these vWAT depots is the perigonadal WAT, making it the most frequently studied vWAT depot in rodents (Chusyd et al., 2016).

BAT is a thermogenic tissue that helps in the regulation of body temperature through non-shivering thermogenesis (Foster and Frydman, 1979) and is composed of multilocular brown adipocytes that have numerous mitochondria and increased expression of the gene encoding the uncoupling protein 1 (UCP1) (Cousin et al., 1992). UCP1 increases proton leakage across the inner mitochondrial membrane and releases the proton motive force as heat rather than driving ATP synthase (Klingenberg, 1990), resulting in a thermogenic effect. Anatomists alluded to the presence of BAT in adult humans in the early 1900s (Bonnot, 1908; Rasmussen, 1922); however, in 2009, three seminal papers confirmed the presence of active BAT in adult humans, leading to an increased focus on this tissue in metabolic research (Cypess et al., 2009; Saito et al., 2009; van Marken Lichtenbelt et al., 2009). In adult humans, BAT is found in the neck, supraclavicular and axillary regions, in the paravertebral region, and around major blood vessels, including the aorta and renal arteries (Sacks and Symonds, 2013). The amount of BAT in humans varies with body mass index, age, gender and environmental factors, including outdoor cold exposure (Saito et al., 2009; van Marken Lichtenbelt et al., 2009; Cypess et al., 2009). Although the largest BAT depot in rodents is located in the interscapular region, just as in humans, BAT can also be found in rodents around the neck, mediastinal region, and around major vessels, including the aorta and renal arteries (Cinti, 2007).

The third type of adipose tissue is beige adipose tissue. Beige adipocytes derive from a Myf5<sup>-</sup> cell lineage, whereas classical brown fat adipocytes originate from a Myf5<sup>+</sup> cell lineage (Harms and Seale, 2013). Beige adipocytes are found intermixed within the WAT and appear morphologically similar to brown adipocytes with

Department of Physiology and Cell Biology, Dorothy M. Davis Heart and Lung Research Institute, The Ohio State University Wexner Medical Center, Columbus, Ohio 43210, USA.

\*Author for correspondence (kristin.stanford@osumc.edu)

 K.I.S., 0000-0002-0681-7746

multilocular lipid droplets and an abundance of mitochondria (Hirshman et al., 1989; Enerbäck, 2009; Petrovic et al., 2010; Ishibashi and Seale, 2010). In rodents, beige cells can be induced by a variety of stimuli, including  $\beta$ 3-selective adrenergic agonists (Ishibashi and Seale, 2010), cold-exposure (Petrovic et al., 2010), exercise (Stanford et al., 2015a,b; Sutherland et al., 2009; Trevellin et al., 2014; Boström et al., 2012; Cao et al., 2011) and an enriched environment (Cao et al., 2011). Upon stimulation, beige adipocytes express very high levels of Ucp1, show increased fuel oxidation and contribute to non-shivering thermogenesis (Wu et al., 2012; Shabalina et al., 2013). The presence of beige adipocytes in humans has not been studied as extensively as it has in rodents; however, human scWAT has been shown to contain cells that, upon activation, express high levels of UCP1 and other beige markers (Elabd et al., 2009).

### Exercise effects on WAT

Exercise-training, defined as regular bouts of physical activity over a span of weeks, months or years, has well-established effects on adipocyte size (Gollisch et al., 2009; Craig et al., 1981), mitochondrial activity (Stanford et al., 2015a,b; Trevellin et al., 2014; Stallknecht et al., 1991), secretion of adipokines (Golbidi and Laher, 2014; Zachwieja et al., 1997; Bradley et al., 2008; Kraemer et al., 1999; Kanaley et al., 2001) and gene expression (Stanford et al., 2015a,b) in both vWAT and scWAT. There are also specific adaptations to each WAT depot, including adaptations to the structural lipidomic profile changes in scWAT (May et al., 2017) and the beiging of scWAT in rodents (Stanford et al., 2015a,b; Sutherland et al., 2009; Trevellin et al., 2014; Boström et al., 2012; Cao et al., 2011; Stanford and Goodyear, 2016) (Fig. 1).

### Exercise increases mitochondrial activity in both scWAT and vWAT

An exercise-induced increase in mitochondrial activity has been observed in both the vWAT and scWAT of rodents (Stanford et al., 2015a,b; Stallknecht et al., 1991; Vernochet et al., 2012; Wu et al., 2014). Studies examining the effects of swim training over a

4- or 8-week period reported increased cytochrome *c* oxidase activity in vWAT and increased expression of the mitochondrial marker *Pgc1 $\alpha$*  in both vWAT and scWAT, indicating an increase in mitochondrial activity (Sutherland et al., 2009; Stallknecht et al., 1991). Investigations on the effects of treadmill exercise on adipose tissue in rats showed that 8 weeks of treadmill training also significantly increased the amount of *Pgc1 $\alpha$*  in the scWAT of the exercise-trained rats (Wu et al., 2014). A study in our laboratory demonstrated an increase in mitochondrial activity in the scWAT of mice after 11 days of voluntary wheel cage running by measuring the oxygen consumption rate and mitochondrial gene expression levels (Stanford et al., 2015a,b). Importantly, these studies demonstrate that a variety of exercise modalities (swimming, treadmill training or voluntary exercise), over varying amounts of time (11 days to 8 weeks) all result in an increase in mitochondrial activity in the WAT of rodents.

An exercise-induced increase in mitochondrial activity in the WAT of humans has also been observed. One study investigated a 6-month mild exercise intervention consisting of 3 h of exercise per week (1 h of spinning on a cycle ergometer and two 1-h sessions of aerobic exercise per week) in healthy, sedentary men. After 6 months of exercise, the expression of genes involved in oxidative phosphorylation was significantly increased in the scWAT of the subjects (Rönn et al., 2014). Another study investigated the effects of an intensive, 4-week exercise intervention (three 1-h sessions of swimming or biking in total/week) in sedentary men and women who had normal glucose tolerance, impaired glucose tolerance or who were type 2 diabetics. Four weeks of exercise training significantly increased the expression of *PGC1 $\alpha$*  in the scWAT of these subjects, regardless of gender or pre-exercise glucose tolerance status (Ruschke et al., 2010). Together, these studies consistently demonstrate that exercise training has marked effects on mitochondrial gene expression and activity in human WAT. Importantly, these changes in mitochondrial activity occurred in both rodents and humans, in response to various modalities of exercise, and over various training durations.

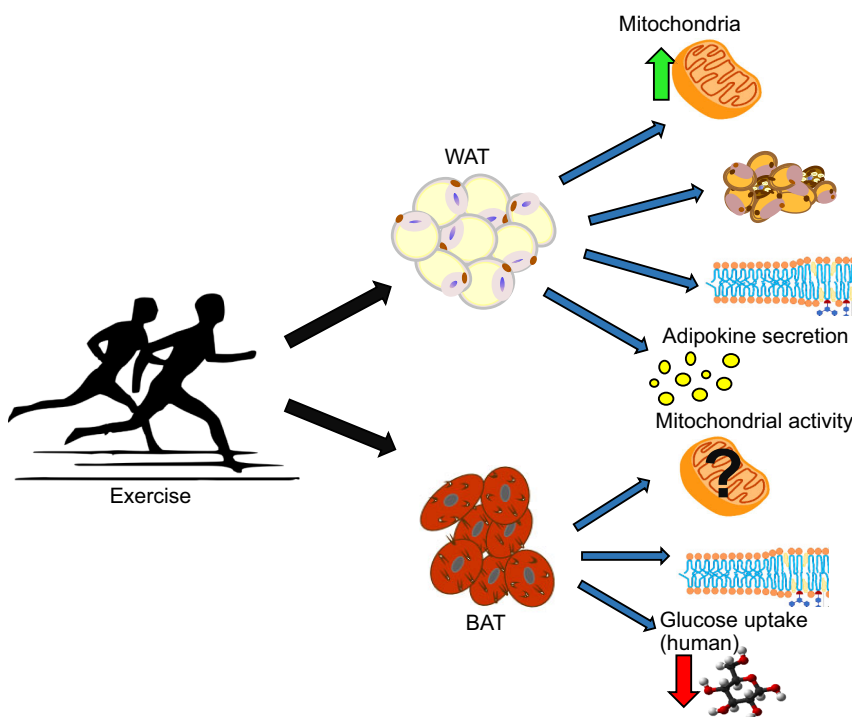

**Fig. 1. Exercise-induced adaptations to white adipose tissue (WAT) and brown adipose tissue (BAT).**

Exercise-induced adaptations to WAT include increased mitochondrial activity, beiging of scWAT in rodents, changes to the lipidome and altered adipokine secretion. Exercise-induced adaptations to BAT include changes to mitochondrial activity, adaptations to the lipidome and decreases in glucose uptake in humans.

### Exercise-induced adaptations to WAT improve overall metabolic health

Exercise training alters many characteristics of WAT, including mitochondrial biogenesis, gene expression and adipocyte morphology. Exercise training improves whole-body glucose homeostasis and increases insulin sensitivity (Bonadonna et al., 1993). However, the effects of exercise-induced adaptations to WAT on whole-body metabolic health have not been fully established. Our laboratory addressed this question by transplanting exercise-trained WAT into sedentary mice (Stanford et al., 2015a,b). In this study, 10-week-old mice were either sedentary or exercise-trained in voluntary wheel cages for 11 days. The scWAT and vWAT from both the sedentary and exercise-trained mice were removed and transplanted into age-matched sedentary mice. Nine days post-transplantation, there was a pronounced improvement in the glucose tolerance of mice that had received the exercise-trained scWAT transplant compared with that of mice that received the sedentary scWAT transplant and that of the sham-operated controls (Fig. 2A). Interestingly, there was no difference in glucose tolerance among mice that received sedentary vWAT, exercise-trained vWAT or were sham-operated (Fig. 2B) (Stanford et al., 2015a,b). These data demonstrate that exercise-induced adaptations to scWAT and vWAT in mice are different and have dramatically different effects on overall metabolic health.

After recording the striking improvement in glucose tolerance in mice that received exercise-trained scWAT, these mice underwent further metabolic characterization (Stanford et al., 2015a,b). Mice that received exercise-trained scWAT showed a decrease in fasting blood glucose, insulin and cholesterol concentrations compared with mice that received sedentary scWAT and the sham-operated mice. Insulin tolerance testing also revealed increased peripheral insulin sensitivity in mice that received exercise-trained scWAT compared with that of other groups. Mice transplanted with exercise-trained scWAT showed increased insulin-stimulated glucose uptake in their skeletal muscle and BAT compared with mice that received sedentary scWAT and the sham-operated mice. Taken together, these data indicate that exercise-induced adaptations to scWAT have a beneficial effect on whole-body metabolism, and these improvements occur independently of exercise-induced adaptations to other tissues of influence. Importantly, the beneficial effects of transplanting exercise-trained scWAT diminished rapidly. The improvement in glucose tolerance was not as pronounced at 14 days post-transplantation, and there was only a trend for improved

glucose tolerance at day 28. Nevertheless, the novel finding that transplantation of exercise-trained scWAT leads to a short-term systemic improvement in glucose tolerance is important. Future studies will investigate whether the exercise-induced improvements are a result of adipokines secreted from trained scWAT, or a direct effect of transplantation of 'beige' scWAT.

### Exercise alters adipokine secretion

Adipokines are cytokines that are secreted from adipose tissue and act in an autocrine, paracrine or endocrine manner to affect other tissues (Greenberg and Obin, 2006). It is possible that certain beneficial effects of exercise are mediated by an altered adipokine profile (Yamauchi et al., 2002; Singh et al., 2003; Yaspelkis et al., 2004). The two adipokines that have been studied the most, adiponectin and leptin, are significantly affected by exercise and will be the focus of this section. However, there is a myriad of other adipokines (including IL-6 and TNF- $\alpha$ ) that are beyond the scope of this Review. Adiponectin plasma levels are inversely correlated with body mass index, vWAT mass and insulin resistance in humans (Mazaki-Tovi et al., 2005). Several studies have investigated the effect of exercise on adiponectin concentration in humans. Although some studies found that the concentration of circulating adiponectin increased after exercise (Lim et al., 2008; Kondo et al., 2006), in other studies, the concentration of circulating adiponectin was unchanged after exercise (Jürimäe et al., 2007; O'Leary et al., 2006; Klimcakova et al., 2006; Nassis et al., 2005; Hara et al., 2005). Likewise, some studies have reported that the concentration of circulating adiponectin in healthy and diabetic rodents increased after exercise (Zeng et al., 2007; Lee et al., 2011), whereas in other studies, the concentration of circulating adiponectin in healthy rodents was unchanged after exercise (Lee et al., 2011; Bhattacharya et al., 2005; Huang et al., 2007).

Leptin is perhaps the adipokine that has been investigated the most. Leptin is released from several tissues, including WAT, BAT, the placenta and the stomach; however, WAT is the principal site of leptin synthesis and secretion and the major determinant of the level of circulating leptin (Trayhurn and Beattie, 2001). Leptin works as a satiety hormone to regulate energy balance through inhibition of hunger. The amount of circulating leptin correlates with adipose tissue mass: a loss of adipose tissue mass in rodents and humans results in decreased serum concentrations of leptin (Zachwieja et al., 1997; Bradley et al., 2008; Kraemer et al., 1999; Kanaley et al., 2001).

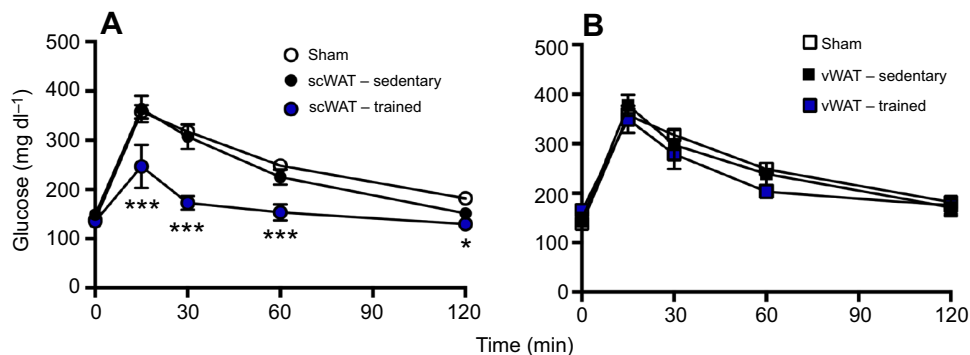

**Fig. 2. Transplantation of trained subcutaneous white adipose tissue (scWAT) improves glucose tolerance.** Mice were transplanted with scWAT (0.85 g) or vWAT (1.0 g) from sedentary or trained mice or were sham operated. For glucose tolerance tests (GTTs), mice were injected with glucose 2 g kg<sup>-1</sup> body mass i.p. (A) GTT at 9 days post-transplantation for mice transplanted with scWAT and (B) GTT at 9 days post-transplantation for mice transplanted with vWAT. Data are means  $\pm$  s.e.m. ( $N=5-12$  per group). \* $P<0.05$ , \*\*\* $P<0.001$ . Adapted from Stanford et al. (2015a).

In studies of both lean and obese humans, varying durations of aerobic exercise interventions (4 weeks–1 year) resulted in significant decreases in serum leptin levels; these decreases also correlated with a decrease in fat mass (Yamauchi et al., 2002; Nassis et al., 2005; Sari et al., 2007; Ozcelik et al., 2004; Polak et al., 2006). However, the serum leptin concentration of healthy human subjects was unchanged by resistance exercise (Ara et al., 2006). More investigations are necessary to fully elucidate the role of exercise in the regulation of adipokines.

### Lipidomic changes to scWAT

The rapidly expanding field of lipidomics shows great promise as a means of providing further insight into exercise-induced adaptations to adipose tissue. A recent study in our laboratory investigated the lipidome of scWAT in response to exercise (May et al., 2017). We utilized an MS/MS<sup>ALL</sup> shotgun lipidomics approach to comprehensively characterize the changes that occurred to the lipidome of scWAT in mice in response to 3 weeks of exercise training. Exercise resulted in a significant decrease in the overall abundance of triacylglycerol (TAG), phosphatidylserines (PS), lysophosphatidylglycerols and lysophosphatidylinositols. There were also numerous decreases in specific molecular species of phosphatidic acid, phosphatidylethanolamines (PE) and PS in scWAT. These changes corresponded with a significant upregulation of several genes involved in phospholipid metabolism (*Acp1*, *Gpd1*, *Pla2g12a*, *Gpm* and *Ipla2g*). The overall abundance of TAGs was significantly decreased in scWAT, and the genes regulating fatty acid biosynthesis and elongation (*Evol3*, *Evol4*, *Acaca*, *Gpm*, *Acp1* and *Ppara*) were upregulated with exercise. These data suggest molecular species-specific remodeling of phospholipids and TAGs in scWAT in response to exercise. The decrease in overall TAGs in scWAT, coupled with the upregulation of genes that code for fatty acid biosynthesis and elongation may indicate that the scWAT is working to create a fuel source for the working muscle during exercise (May et al., 2017). Future studies are required to determine the physiological consequences of the exercise-induced changes to the lipidome of scWAT and whether these changes contribute to insulin sensitivity or to other metabolic changes seen with exercise.

### Exercise causes beiging in rodent scWAT

An important exercise-induced adaptation to WAT in rodents is the increase in ‘beiging’ that occurs in inguinal scWAT. This exercise-induced beiging in inguinal scWAT has been identified in numerous rodent studies investigating the effect of exercise training periods of 11–30 days, including those involving running or swimming (Stanford et al., 2015a,b; Trevellin et al., 2014; Boström et al., 2012; Cao et al., 2011). These beiging adaptations include upregulation of *Ucp1*, *Prdm16*, *Cidea*, *Elovl3*, *Pgc1α*, *Pparγ*, *Cox8b*, *Dio2* and otopetrin, as well as increased multilocular cells within the scWAT (Wu et al., 2012).

The unique ability of this phenotypic switch to increase energy expenditure and potentially combat metabolic disease makes the understanding of this mechanism an important topic for investigators. The beiging of scWAT by non-exercise stimuli, including through cold-exposure, environmental factors or pharmaceuticals, is believed to be induced through a heat compensatory mechanism in which adrenergic stimulation compensates for heat loss with the upregulation of *UCP1* (Cousin et al., 1992; Cannon and Nedergaard, 2004; Ghorbani and Himms-Hagen, 1997; Ghorbani et al., 1997). However, this mechanism does not make sense in the context of exercise-induced beiging because exercise increases heat

production (Saugen and Vøllestad, 1995). Several hypotheses have been proposed as the underlying mechanism (Stanford and Goodyear, 2016), one of which is increased sympathetic innervation, which is known to occur in scWAT during exercise (Nedergaard et al., 2014; Ranallo and Rhodes, 1998). Other hypotheses focus on the exercise-stimulated release of myokines, including irisin (Boström et al., 2012), myostatin (Feldman et al., 2006), meteorin-like 1 (*Metnl*) (Rao et al., 2014), lactate (Carriere et al., 2014) and β-aminoisobutyric acid (BAIBA) (Roberts et al., 2014), as well as other secreted factors, including brain-derived neurotrophic factor (BDNF) (Cao et al., 2011). More investigation is needed to fully understand this complex mechanism.

The number of beige adipocytes increases during exercise, which is counterintuitive; exercising skeletal muscles generate heat, so it is unclear why exercise would induce a thermogenic, heat-producing beige adipocyte (Saugen and Vøllestad, 1995). It has been suggested that exercise-induced beiging of scWAT occurs because exercise decreases the adipocyte size and lipid content in scWAT, thus decreasing insulation of the body and necessitating heat production, resulting in the beiging of scWAT (Nedergaard et al., 2014; Stanford and Goodyear, 2016). This hypothesis presents a potential evolutionary significance; it is likely that foraging animals traveling great distances to find food would need a certain amount of plasticity in their adipose tissue to maintain body temperature and, thus, the ability to beige white adipocytes would be evolutionarily advantageous.

Although exercise-induced beiging of scWAT has been well established in rodents, exercise-induced beiging in human scWAT is less clear (Norheim et al., 2014; Vosselman et al., 2015). In a study involving males aged 40–65 years with either normal blood glucose or prediabetic glycemia, a 12-week strength and endurance training program had little effect on the expression of *UCP1* in the scWAT of the subjects, suggesting no change in the thermogenic capacity of the scWAT (Norheim et al., 2014). Other beiging markers (*PRDM16*, *TBX1*, *TMEM26* and *CD137*) were also unaltered in the normal and prediabetic subjects. Another study examined the scWAT of 12 endurance trained athletes and 12 lean sedentary males and found no difference in the mRNA expression of *UCP1* in either the trained or sedentary groups (Vosselman et al., 2015). Although exercise is known to induce significant adaptations to rodent scWAT (Stanford et al., 2015a,b; Trevellin et al., 2014; Boström et al., 2012; Cao et al., 2011), further investigation is required to determine how exercise affects human beige scWAT.

### The curious effects of exercise on BAT

BAT is a thermogenic tissue that is involved in heat production and energy expenditure (Foster and Frydman, 1979). Given that exercise also increases energy expenditure and heat production, it would not be surprising if BAT was downregulated with exercise to maintain body temperature. However, studies investigating the effects of exercise on BAT have yielded conflicting results (Stanford and Goodyear, 2016). In some studies, investigators have shown an increase in mitochondrial activity in rodent BAT (Ignacio et al., 2012; Yoshioka et al., 1989), whereas other studies have revealed a decrease in mitochondrial activity (Wu et al., 2014) and glucose uptake in BAT in exercise-trained humans (Vosselman et al., 2015; Motiani et al., 2017). Exercise has also been shown to affect the composition and concentration of phospholipids and triglycerides in the lipidome of rodent BAT (May et al., 2017).

### Exercise increases BAT mitochondrial activity

To investigate the effects of exercise on BAT activity, young (2-month-old) and old (26-month-old) male mice underwent 6 weeks

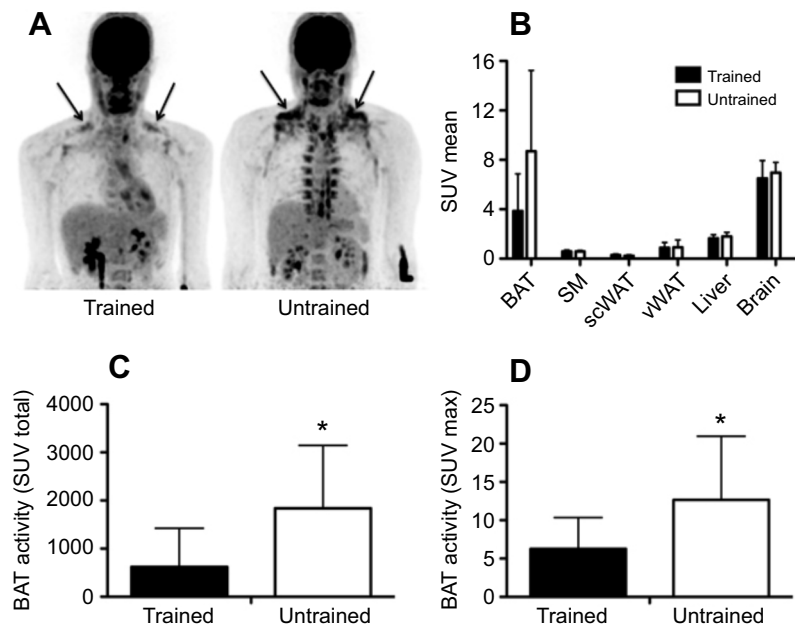

**Fig. 3. Decreased uptake of  $^{18}\text{F}$ -fluorodeoxyglucose ( $^{18}\text{F}$ ]FDG) in brown adipose tissue (BAT) during cold exposure in trained subjects.** (A) Representative  $^{18}\text{F}$ ]FDG-positron emission tomography images demonstrating glucose uptake in trained and untrained test subjects. Black arrows indicate supraclavicular BAT. (B) The average  $^{18}\text{F}$ ]FDG uptake (standardized uptake value,  $\text{SUV}_{\text{mean}}$ ) measured in multiple tissues in trained and untrained subjects. SM, skeletal muscle; scWAT, subcutaneous white adipose tissue; vWAT, visceral WAT. (C,D) BAT activity, in  $\text{SUV}_{\text{total}}$  (C) and  $\text{SUV}_{\text{max}}$  (D), in trained and untrained subjects. Differences between groups were measured using independent sample *t*-tests. Values are expressed as means  $\pm$  s.d. \* $P < 0.05$ . Adapted with permission from Springer Customer Service Centre GmbH [Springer/Nature; International Journal of Obesity, Low brown adipose tissue activity in endurance trained compared to lean sedentary men; M. J. Vosselman, J. Hoeks, B. Brans, H. Pallubinsky, E. B. Nascimento, A. A. van der Lans, E. P. Broeders, F. M. Mottaghy, P. Schrauwen and W. D. van Marken Lichtenbelt (2015)].

of exercise training (swimming) (Oh-ishi et al., 1996). The swim training increased BAT mass and total protein content in young and old exercise-trained mice. The training also increased the amount of UCP1 antigen in BAT compared with that of the sedentary controls. Other studies examining the effects of 6–8 weeks of swim training in rodents have reported increased blood flow to BAT (Hirata, 1982), increased mitochondrial activity (Ignacio et al., 2012), and increased type 2 deiodinase (dio2) enzymatic activity and mitochondrial respiration in BAT (Ignacio et al., 2012). Rodents that experienced other exercise modalities, including 6–8 weeks of treadmill training, showed an increase in BAT activity: for example, increased cytochrome oxidase activity (Yoshioka et al., 1989), increased oxygen consumption rates (Yoshioka et al., 1989) and upregulation of BAT-specific gene markers (Yoshioka et al., 1989; Xu et al., 2011, 2012). These data suggest that exercise training in rodents can increase mitochondrial biogenesis and activity in BAT.

#### Exercise decreases BAT mitochondrial activity and glucose uptake

In contrast to the studies discussed above, more recent studies in rodents and humans have identified a decrease in BAT activity in response to exercise. In a rodent study, 8 weeks of treadmill exercise at 75–85% of  $V_{\text{O}_{2,\text{max}}}$  for 60 min  $\text{day}^{-1}$ , 5 days  $\text{week}^{-1}$ , resulted in a significant decrease in interscapular BAT mass of 39% compared with that of the sedentary controls (Wu et al., 2014). *Ucp1*, *Pgc1 $\alpha$*  and fatty acid oxidation were significantly decreased in the BAT of exercise-trained rats.

In humans, two recent studies have investigated the effects of exercise-training on BAT activity. In the first study, 12 lean, sedentary males and 12 endurance-trained athletes aged 18–35 years underwent 2 h of mild cold exposure to investigate cold-induced activation of BAT (Vosselman et al., 2015). BAT activity was measured using  $^{18}\text{F}$ -fluorodeoxyglucose-positron emission tomography-computed tomography ( $^{18}\text{F}$ ]FDG-PET-CT): endurance-trained athletes had significantly decreased cold-stimulated BAT activity compared with that of their lean sedentary counterparts, suggesting that endurance training is linked with lower metabolic activity of BAT in humans (Fig. 3). A second study in humans looked at the effects of short-term

exercise training, both high-intensity interval training and moderate-intensity continuous training, on BAT metabolism in sedentary men using 2- $^{18}\text{F}$ ]fluoro-2-deoxy-D-glucose (FDG) and 14(R,S)- $^{18}\text{F}$ ]fluoro-6-thia-heptadecanoic acid (FTHA) (Motiani et al., 2017). Twenty-eight healthy, middle-aged, sedentary men participated in the study. Basal measures of BAT activity were obtained prior to exercise intervention: subjects with highly active basal BAT had lower body adiposity and leptin concentration, greater whole-body insulin sensitivity and higher high-density lipoprotein cholesterol, suggesting an overall metabolically healthier individual. Exercise training decreased insulin-stimulated glucose uptake in the BAT of subjects who had highly active BAT prior to exercise intervention; however, there was no change in insulin-stimulated glucose uptake in the BAT of subjects who had low active BAT prior to exercise intervention.

In humans, studies investigating the effects of exercise on BAT have only observed a decrease in BAT activity (Vosselman et al., 2015; Motiani et al., 2017). This does not mean that there are no exercise-induced adaptations to BAT; however, these data show exercise decreases cold- or insulin-stimulated glucose uptake in human BAT. This demonstrates that BAT may have different roles in response to exercise in rodents compared with that in humans and that the mechanism by which these exercise adaptations occur may differ between the two species. These varying results between rodents and humans warrant more investigation to determine how BAT responds to exercise and whether it shows potential as a therapeutic remedy to combat metabolic disorders in humans.

#### Lipidomic changes to BAT

Recent work in our laboratory investigated the effects of exercise on the BAT lipidome in mice (May et al., 2017). After 3 weeks of voluntary wheel cage running, there was a significant decrease in the abundance of three major lipid classes: TAGs, phosphatidylcholines (PC) and cholesterol esters. Exercise also significantly increased several specific molecular species of PC and PE in BAT. Genes involved in phospholipid metabolism, including *Agpat3*, *Gpd1*, *Lgpat1*, *Ptdss2* and *Pld1*, were significantly downregulated in BAT after exercise. Genes regulating fatty acid biosynthesis, including *Acaca*, *Scd1*, *Agpat3*, *Dgkd* and *Mlxpl*, were significantly

downregulated in BAT, mirroring the decrease in the overall abundance of TAGs in BAT. The physiological mechanism behind these species-specific lipidomic adaptations and the effect on function, glucose tolerance and insulin sensitivity has not been determined and will be the topic of future investigations.

## Conclusions

Several investigations have demonstrated numerous adaptations to WAT and BAT in response to exercise. In WAT, these adaptations include increased mitochondrial biogenesis and gene expression, changes to adipokine secretion, alterations in the lipidome of scWAT and an increased beiging of scWAT in rodents. Exercise-induced adaptations to scWAT also lead to improvements in whole-body metabolic health, supporting the idea that adipose tissue plays an important role as a major endocrine organ that can be stimulated by exercise. In BAT, the effects of exercise are less clear. In rodents, the mitochondrial activity of BAT has been reported to both increase and decrease in response to exercise. In humans, exercise-training decreases cold- and insulin-stimulated glucose uptake in BAT. This may demonstrate that rodent BAT and human BAT respond differently to exercise. More investigation is required to fully understand the impact of exercise-induced adaptations to adipose tissue and their effect on metabolic health. Elucidation of the adaptations to adipose tissue with exercise may ultimately lead to more effective exercise intervention programs and therapeutic remedies aimed at combating the growing epidemic of metabolic diseases.

## Acknowledgements

The authors thank Lisa A. Baer for critical feedback and discussions.

## Competing interests

The authors declare no competing or financial interests.

## Funding

This work was supported by National Institutes of Health Grant K01-DK-105109 and R01-HL-138738 (to K.I.S.). Deposited in PMC for release after 12 months.

## References

- Ara, I., Perez-Gomez, J., Vicente-Rodriguez, G., Chavarren, J., Dorado, C. and Calbet, J. A. L. (2006). Serum free testosterone, leptin and soluble leptin receptor changes in a 6-week strength-training programme. *Br. J. Nutr.* **96**, 1053-1059.
- Bhattacharya, A., Rahman, M. M., Sun, D., Lawrence, R., Mejia, W., McCarter, R., O'Shea, M. and Fernandes, G. (2005). The combination of dietary conjugated linoleic acid and treadmill exercise lowers gain in body fat mass and enhances lean body mass in high fat-fed male Balb/C mice. *J. Nutr.* **135**, 1124-1130.
- Bonadonna, R. C., Del Prato, S., Saccomani, M. P., Bonora, E., Gulli, G., Ferrannini, E., Bier, D., Cobelli, C. and Defronzo, R. A. (1993). Transmembrane glucose transport in skeletal muscle of patients with non-insulin-dependent diabetes. *J. Clin. Invest.* **92**, 486-494.
- Bonnot, E. (1908). The interscapular gland. *J. Anat. Physiol.* **43**, 43-58.
- Boström, P., Wu, J., Jedrychowski, M. P., Korde, A., Ye, L., Lo, J. C., Rasbach, K. A., Boström, E. A., Choi, J. H., Long, J. Z. et al. (2012). A PGC1- $\alpha$ -dependent myokine that drives brown-fat-like development of white fat and thermogenesis. *Nature* **481**, 463-468.
- Bradley, R. L., Jeon, J. Y., Liu, F.-F., Maratos-Flier, E. (2008). Voluntary exercise improves insulin sensitivity and adipose tissue inflammation in diet-induced obese mice. *Am. J. Physiol. Endocrinol. Metab.* **295**, E586-E594.
- Cannon, B. and Nedergaard, J. (2004). Brown adipose tissue: function and physiological significance. *Physiol. Rev.* **84**, 277-359.
- Cao, L., Choi, E. Y., Liu, X., Martin, A., Wang, C., Xu, X. and During, M. J. (2011). White to brown fat phenotypic switch induced by genetic and environmental activation of a hypothalamic-adipocyte axis. *Cell Metab.* **14**, 324-338.
- Carey, V. J., Walters, E. E., Condit, G. A., Solomon, C. G., Willet, W. C., Rosner, B. A., Speizer, F. E. and Manson, J. E. (1997). Body Fat Distribution and Risk of Non-Insulin-dependent Diabetes Mellitus in Women. *Am. J. Epidemiol.* **145**, 614-619.
- Carriere, A., Jeanson, Y., Berger-Muller, S., Andre, M., Chenouard, V., Arnaud, E., Barreau, C., Walther, R., Galinier, A., Wdziekonski, B. et al. (2014). Browning of white adipose cells by intermediate metabolites: an adaptive mechanism to alleviate redox pressure. *Diabetes* **63**, 3253-3265.
- Chusyd, D. E., Wang, D., Huffman, D. M. and Nagy, T. R. (2016). Relationships between rodent white adipose fat pads and human white adipose fat depots. *Front. Nutr.* **3**, 10.
- Cinti, S. (2007). The adipose organ. In *Adipose Tissue and Adipokines in Health and Disease*, pp. 3-19. Totowa, NJ: Humana Press.
- Cousin, B., Cinti, S., Morroni, M., Raimbault, S., Ricquier, D., Pénicaud, L. and Casteilla, L. (1992). Occurrence of brown adipocytes in rat white adipose tissue: molecular and morphological characterization. *J. Cell Sci.* **931-942**.
- Craig, B. W., Hammons, G. T., Garthwaite, S. M., Jarett, L. and Holloszy, J. O. (1981). Adaptation of fat cells to exercise: response of glucose uptake and oxidation to insulin. *J. Appl. Physiol.* **51**, 1500-1506.
- Crandall, J. P., Knowler, W. C., Kahn, S. E., Marrero, D., Florez, J. C., Bray, G. A., Haffner, S. M., Hoskin, M. and Nathan, D. M. (2008). The prevention of type 2 diabetes. *Nat. Clin. Pr. End. Met.* **4**, 382-393.
- Cypess, A. M., Lehman, S., Williams, G., Tal, I., Rodman, D., Goldfine, A. B., Kuo, F. C., Palmer, E. L., Tseng, Y.-H., Doria, A. et al. (2009). Identification and importance of brown adipose tissue in adult humans. *N. Engl. J. Med.* **360**, 1509-1517.
- Elabd, C., Chiellini, C., Carmona, M., Galitzky, J., Cochet, O., Petersen, R., Pénicaud, L., Kristiansen, K., Bouloumié, A., Casteilla, L. et al. (2009). Human multipotent adipose-derived stem cells differentiate into functional brown adipocytes. *Stem Cells.* **27**, 2753-2760.
- Enerbäck, S. (2009). The origins of brown adipose tissue. *N. Engl. J. Med.* **360**, 2021-2023.
- Feldman, B. J., Streeper, R. S., Farese, R. V. and Yamamoto, K. R. (2006). Myostatin modulates adipogenesis to generate adipocytes with favorable metabolic effects. *Proc. Natl. Acad. Sci. USA* **103**, 15675-15680.
- Foster, D. O. and Frydman, M. L. (1979). Tissue distribution of cold-induced thermogenesis in conscious warm- or cold-acclimated rats reevaluated from changes in tissue blood flow: the dominant role of brown adipose tissue in the replacement of shivering by nonshivering thermogenesis. *Can. J. Physiol. Pharmacol.* **57**, 257-270.
- Ghorbani, M. and Himms-Hagen, J. (1997). Appearance of brown adipocytes in white adipose tissue during CL 316,243-induced reversal of obesity and diabetes in Zucker fa/fa rats. *Int. J. Obes. Relat. Metab. Disord.* **21**, 465-475.
- Ghorbani, M., Claus, T. H. and Himms-Hagen, J. (1997). Hypertrophy of brown adipocytes in brown and white adipose tissues and reversal of diet-induced obesity in rats treated with a beta3-adrenoceptor agonist. *Biochem. Pharmacol.* **54**, 121-131.
- Golbidi, S. and Laher, I. (2014). Exercise induced adipokine changes and the metabolic syndrome. *J. Diabetes Res.* **2014**, 726861.
- Gollisch, K. S. C., Brandauer, J., Jessen, N., Toyoda, T., Nayer, A., Hirshman, M. F. and Goodyear, L. J. (2009). Effects of exercise training on subcutaneous and visceral adipose tissue in normal- and high-fat diet-fed rats. *AJP Endocrinol. Metab.* **297**, E495-E504.
- Greenberg, A. S. and Obin, M. S. (2006). Obesity and the role of adipose tissue in inflammation and metabolism. *Am. J. Clin. Nutr.* **83**, 461S-465S.
- Hara, T., Fujiwara, H., Nakao, H., Mimura, T., Yoshikawa, T. and Fujimoto, S. (2005). Body composition is related to increase in plasma adiponectin levels rather than training in young obese men. *Eur. J. Appl. Physiol.* **94**, 520-526.
- Harms, M. and Seale, P. (2013). Brown and beige fat: development, function and therapeutic potential. *Nat. Med.* **19**, 1252-1263.
- Hirata, K. (1982). Blood flow to brown adipose tissue and norepinephrine-induced calorogenesis in physically trained rats. *Jpn. J. Physiol.* **32**, 279-291.
- Hirshman, M. F., Wardzala, L. J., Goodyear, L. J., Fuller, S. P., Horton, E. D. and Horton, E. S. (1989). Exercise training increases the number of glucose transporters in rat adipose cells. *Am. J. Physiol.* **257**(4 Pt 1), E520-E530.
- Holloszy, J. O. and Coyle, E. F. (1984). Adaptations of skeletal muscle to endurance exercise and their metabolic consequences. *J. Appl. Physiol.* **56**, 831-838.
- Huang, H., Iida, K., Sone, H. and Ajisaka, R. (2007). The regulation of adiponectin receptors expression by acute exercise in mice. *Exp. Clin. Endocrinol. Diabetes* **115**, 417-422.
- Ibrahim, M. M. (2010). Subcutaneous and visceral adipose tissue: structural and functional differences. *Obes. Rev.* **11**, 11-18.
- Ignacio, D., Fortunato, R., Neto, R. A., Da Silva Silvestre, D., Nigro, M., Frankenfeld, T. G., Werneck-De-Castro, J. P. and Carvalho, D. (2012). Blunted response of pituitary type 1 and brown adipose tissue type 2 deiodinases to swimming training in ovariectomized rats. *Horm. Metab. Res.* **44**, 797-803.
- Ishibashi, J. and Seale, P. (2010). Beige can be slimming. *Science (80-)* **328**, 1113-1114.
- Jürimäe, J., Purge, P. and Jürimäe, T. (2007). Effect of prolonged training period on plasma adiponectin in elite male rowers. *Horm. Metab. Res.* **39**, 519-523.
- Kanaley, J. A., Fenicchia, L. M., Miller, C. S., Ploutz-Snyder, L. L., Weinstock, R. S., Carhart, R. and Azevedo, J. L. Jr (2001). Resting leptin responses to acute and chronic resistance training in type 2 diabetic men and women. *Int. J. Obes.* **25**, 1474-1480.
- Klimcakova, E., Polak, J., Moro, C., Hejnova, J., Majercik, M., Viguier, N., Berlan, M., Langin, D. and Stich, V. (2006). Dynamic strength training improves insulin sensitivity without altering plasma levels and gene expression of

- adipokines in subcutaneous adipose tissue in obese men. *J. Clin. Endocrinol. Metab.* **91**, 5107-5112.
- Klingenberg, M.** (1990). Mechanism and evolution of the uncoupling protein of brown adipose tissue. *Trends Biochem. Sci.* **15**, 108-112.
- Kondo, T., Kobayashi, I. and Murakami, M.** (2006). Effect of exercise on circulating adipokine levels in obese young women. *Endocr. J.* **53**, 189-195.
- Kraemer, R. R., Johnson, L. G., Haltom, R., Kraemer, G. R., Hebert, E. P., Gimpel, T. and Castracane, V. D.** (1999). Serum leptin concentrations in response to acute exercise in postmenopausal women with and without hormone replacement therapy. *Proc. Soc. Exp. Biol. Med.* **221**, 171-177.
- Lee, S., Park, Y., Dellsperger, K. C. and Zhang, C.** (2011). Exercise training improves endothelial function via adiponectin-dependent and independent pathways in type 2 diabetic mice. *AJP Hear. Circ. Physiol.* **301**, H306-H314.
- Lim, S., Choi, S. H., Jeong, I.-K., Kim, J. H., Moon, M. K., Park, K. S., Lee, H. K., Kim, Y.-B. and Jang, H. C.** (2008). Insulin-sensitizing effects of exercise on adiponectin and retinol-binding protein-4 concentrations in young and middle-aged women. *J. Clin. Endocrinol. Metab.* **93**, 2263-2268.
- May, F. J., Baer, L. A., Lehnig, A. C., So, K., Chen, E. Y., Gao, F., Narain, N. R., Gushchina, L., Rose, A., Doseff, A. I. et al.** (2017). Lipidomic adaptations in white and brown adipose tissue in response to exercise demonstrate molecular species-specific remodeling. *Cell Rep.* **18**, 1558-1572.
- Mazaki-Tovi, S., Kanety, H. and Sivan, E.** (2005). Adiponectin and human pregnancy. *Curr. Diab Rep.* **5**, 278-281.
- Misra, A., Garg, A., Abate, N., Peshock, R. M., Stray-Gundersen, J. and Grundy, S. M.** (1997). Relationship of anterior and posterior subcutaneous abdominal fat to insulin sensitivity in nondiabetic men. *Obes. Res.* **5**, 93-99.
- Motiani, P., Virtanen, K. A., Motiani, K. K., Eskelinen, J. J., Middelbeek, R. J., Goodyear, L. J., Savolainen, A. M., Kemppainen, J., Jensen, J. and Din, M. U. et al.** (2017). Decreased insulin-stimulated brown adipose tissue glucose uptake after short-term exercise training in healthy middle aged men. *Diabetes Obes. Metab.* **19**.
- Myers, J.** (2003). Exercise and cardiovascular health. *Circulation.* **107**, 2392-2394.
- Nassis, G. P., Papantakou, K., Skenderi, K., Triandafillopoulou, M., Kavouras, S. A., Yannakoulia, M., Chrousos, G. P. and Sidossis, L. S.** (2005). Aerobic exercise training improves insulin sensitivity without changes in body weight, body fat, adiponectin, and inflammatory markers in overweight and obese girls. *Metabolism.* **54**, 1472-1479.
- Nedergaard, J., Cannon, B. and Mitsiadis, T. A.** (2014). The browning of white adipose tissue: some burning issues. *Cell Metab.* **20**, 396-407.
- Norheim, F., Langleite, T. M., Hjorth, M., Holen, T., Kielland, A., Stadheim, H. K., Gulseth, H. L., Birkeland, K. I., Jensen, J. and Drevon, C. A.** (2014). The effects of acute and chronic exercise on PGC-1 $\alpha$ , irisin and browning of subcutaneous adipose tissue in humans. *FEBS J.* **281**, 739-749.
- Oh-Ishi, S., Kizaki, T., Toshinai, K., Haga, S., Fukuda, K., Nagata, N. and Ohno, H.** (1996). Swimming training improves brown-adipose-tissue activity in young and old mice. *Mech. Ageing Dev.* **89**, 67-78.
- O'Leary, V. B., Marchetti, C. M., Krishnan, R. K., Stetzer, B. P., Gonzalez, F. and Kirwan, J. P.** (2006). Exercise-induced reversal of insulin resistance in obese elderly is associated with reduced visceral fat. *J. Appl. Physiol.* **100**, 1584-1589.
- Ozcelik, O., Celik, H., Ayar, A., Serhatioglu, S. and Kelestimur, H.** (2004). Investigation of the influence of training status on the relationship between the acute exercise and serum leptin levels in obese females. *Neuro Endocrinol. Lett.* **25**, 381-385.
- Petrovic, N., Walden, T. B., Shabalina, I. G., Timmons, J. A., Cannon, B. and Nedergaard, J.** (2010). Chronic peroxisome proliferator-activated receptor (PPAR) activation of epididymally derived white adipocyte cultures reveals a population of thermogenically competent, UCP1-containing adipocytes molecularly distinct from classic brown adipocytes. *J. Biol. Chem.* **285**, 7153-7164.
- Polak, J., Klimcakova, E., Moro, C., Viguier, N., Berlan, M., Hejnova, J., Richterova, B., Kraus, I., Langin, D. and Stich, V.** (2006). Effect of aerobic training on plasma levels and subcutaneous abdominal adipose tissue gene expression of adiponectin, leptin, interleukin 6, and tumor necrosis factor  $\alpha$  in obese women. *Metabolism.* **55**, 1375-1381.
- Ranallo, R. F. and Rhodes, E. C.** (1998). Lipid metabolism during exercise. *Sports Med.* **26**, 29-42.
- Rao, R. R., Long, J. Z., White, J. P., Svensson, K. J., Lou, J., Lokurkar, I., Jedrychowski, M. P., Ruas, J. L., Wrann, C. D., Lo, J. C. et al.** (2014). Meteorin-like is a hormone that regulates immune-adipose interactions to increase beige fat thermogenesis. *Cell* **157**, 1279-1291.
- Rasmussen, A. T.** (1922). The glandular status of brown multilocular adipose tissue. *Endocrinology* **6**, 760-770.
- Roberts, L. D., Boström, P., O'sullivan, J. F., Schinzel, R. T., Lewis, G. D., Dejam, A., Lee, Y.-K., Palma, M. J., Calhoun, S., Georgiadi, A. et al.** (2014).  $\beta$ -Aminoisobutyric acid induces browning of white fat and hepatic  $\beta$ -oxidation and is inversely correlated with cardiometabolic risk factors. *Cell Metab.* **19**, 96-108.
- Rönn, T., Volkov, P., Tornberg, Elgzyri, T., Hansson, O., Eriksson, K.-F., Groop, L. and Ling, C.** (2014). Extensive changes in the transcriptional profile of human adipose tissue including genes involved in oxidative phosphorylation after a 6-month exercise intervention. *Acta Physiol.* **211**, 188-200.
- Ruschke, K., Fishbein, L., Dietrich, A., Klötting, N., Tonjes, A., Oberbach, A., Fasshauer, M., Jenkner, J., Schon, M. R., Stumvoll, M. et al.** (2010). Gene expression of PPAR $\gamma$  and PGC-1 $\alpha$  in human omental and subcutaneous adipose tissues is related to insulin resistance markers and mediates beneficial effects of physical training. *Eur. J. Endocrinol.* **162**, 515-523.
- Sacks, H. and Symonds, M. E.** (2013). Anatomical locations of human brown adipose tissue. *Diabetes* **62**, 1783-1790.
- Saito, M., Okamatsu-Ogura, Y., Matsushita, M., Watanabe, K., Yoneshiro, T., Nio-Kobayashi, J., Iwanaga, T., Miyagawa, M., Kameya, T., Nakada, K. et al.** (2009). High incidence of metabolically active brown adipose tissue in healthy adult humans: effects of cold exposure and adiposity. *Diabetes* **58**, 1526-1531.
- Sari, R., Balci, M. K., Balci, N. and Karayalcin, U.** (2007). Acute effect of exercise on plasma leptin level and insulin resistance in obese women with stable caloric intake. *Endocr. Res.* **32**, 9-17.
- Saugen, E. and Vøllestad, N. K.** (1995). Nonlinear relationship between heat production and force during voluntary contractions in humans. *J. Appl. Physiol.* **79**, 2043-2049.
- Shabalina, I. G., Petrovic, N., De Jong Jasper, M. A., Kalinovich, A. V., Cannon, B. and Nedergaard, J.** (2013). UCP1 in Brite/Beige adipose tissue mitochondria is functionally thermogenic. *Cell Rep.* **5**, 1196-1203.
- Singh, M. K., Krisan, A. D., Crain, A. M., Collins, D. E. and Yaspelkis, B. B.** (2003). High-fat diet and leptin treatment alter skeletal muscle insulin-stimulated phosphatidylinositol 3-kinase activity and glucose transport. *Metabolism* **52**, 1196-1205.
- Snijder, M. B., Dekker, J. M., Visser, M., Bouter, L. M., Stehouwer, C. D., Kostense, P. J., Yudkin, J. S., Heine, R. J., Nijpels, G. and Seidell, J. C.** (2003). Associations of hip and thigh circumferences independent of waist circumference with the incidence of type 2 diabetes: the Hoorn Study. *Am. J. Clin. Nutr.* **77**, 1192-1197.
- Stallknecht, B., Vinten, J., Ploug, T. and Galbo, H.** (1991). Increased activities of mitochondrial enzymes in white adipose tissue in trained rats. *Am. J. Physiol.* **261**(3 Pt 1), E410-E414.
- Stanford, K. I. and Goodyear, L. J.** (2016). Exercise regulation of adipose tissue. *Adipocyte* **5**, 153-162.
- Stanford, K. I., Middelbeek, R. J. W., Townsend, K. L., Lee, M.-Y., Takahashi, H., So, K., Hitchcox, K. M., Markan, K. R., Hellbach, K., Hirshman, M. F. et al.** (2015a). A novel role for subcutaneous adipose tissue in exercise-induced improvements in glucose homeostasis. *Diabetes* **64**, 2002-2014.
- Stanford, K. I., Middelbeek, R. J. W. and Goodyear, L. J.** (2015b). Exercise effects on white adipose tissue: being and metabolic adaptations. *Diabetes* **64**, 2361-2368.
- Sutherland, L. N., Bomhof, M. R., Capozzi, L. C., Basaraba, S. A. U. and Wright, D. C.** (2009). Exercise and adrenaline increase PGC-1 $\alpha$  mRNA expression in rat adipose tissue. *J. Physiol.* **587**, 1607-1617.
- Tran, T. T. and Kahn, C. R.** (2010). Transplantation of adipose tissue and adipose-derived stem cells as a tool to study metabolic physiology and for treatment of disease. *Nat. Rev. Endocrinol.* **6**, 24-33.
- Trayhurn, P. and Beattie, J. H.** (2001). Physiological role of adipose tissue: white adipose tissue as an endocrine and secretory organ. *Proc. Nutr. Soc.* **60**, 329-339.
- Trevellin, E., Scorzeto, M., Olivieri, M., Granzotto, M., Valerio, A., Tedesco, L., Fabris, R., Serra, R., Quarta, M., Reggiani, C. et al.** (2014). Exercise training induces mitochondrial biogenesis and glucose uptake in subcutaneous adipose tissue through eNOS-dependent mechanisms. *Diabetes* **63**, 2800-2811.
- Van Marken Lichtenbelt, W. D., Vanhommerig, J. W., Smulders, N. M., Drossaerts, J. M. A. F. L., Kemerink, G. J., Bouvy, N. D., Schrauwen, P. and Teule, G. J. J.** (2009). Cold-activated brown adipose tissue in healthy men. *N. Engl. J. Med.* **360**, 1500-1508.
- Vernochet, C., Mourier, A., Bezy, O., Macotela, Y., Boucher, J., Rardin, M. J., An, D., Lee, K. Y., Ilkayeva, O. R., Zingaretti, C. M. et al.** (2012). Adipose-specific deletion of TFAM increases mitochondrial oxidation and protects mice against obesity and insulin resistance. *Cell Metab.* **16**, 765-776.
- Vosselman, M. J., Hoeks, J., Brans, B., Pallubinsky, H., Nascimento, E. B., van der Lans, A. A., Broeders, E. P., Mottaghy, F. M., Schrauwen, P. and van Marken Lichtenbelt, W. D.** (2015). Low brown adipose tissue activity in endurance trained compared to lean sedentary men. *Int. J. Obes.* **39**, 1-7.
- Wang, Y., Rimm, E. B., Stampfer, M. J., Willett, W. C. and Hu, F. B.** (2005). Comparison of abdominal adiposity and overall obesity in predicting risk of type 2 diabetes among men. *Am. J. Clin. Nutr.* **18**, 555-563.
- Wu, J., Boström, P., Sparks, L. M., Ye, L., Choi, J. H., Giang, A.-H., Khandekar, M., Virtanen, K. A., Nuutila, P., Schaart, G. et al.** (2012). Beige adipocytes are a distinct type of thermogenic fat cell in mouse and human. *Cell* **150**, 366-376.
- Wu, M. V., Bikopoulos, G., Hung, S. and Ceddia, R. B.** (2014). Thermogenic capacity is antagonistically regulated in classical brown and white subcutaneous fat deposits by high fat diet and endurance training in rats. *J. Biol. Chem.* **289**, 34129-34140.
- Xu, X., Ying, Z., Cai, M., Xu, Z., Li, Y., Jiang, S. Y., Tzan, K., Wang, A., Parthasarathy, S., He, G. et al.** (2011). Exercise ameliorates high-fat diet-induced metabolic and vascular dysfunction, and increases adipocyte progenitor

- cell population in brown adipose tissue. *AJP Regul. Integr. Comp. Physiol.* **300**, R1115-R1125.
- Xu, X., Liu, C., Xu, Z., Tzan, K., Wang, A., Rajagopalan, S. and Sun, Q.** (2012). Altered adipocyte progenitor population and adipose-related gene profile in adipose tissue by long-term high-fat diet in mice. *Life Sci.* **90**, 1001-1009.
- Yamauchi, T., Kamon, J., Minokoshi, Y., Ito, Y., Waki, H., Uchida, S., Yamashita, S., Noda, M., Kita, S., Ueki, K. et al.** (2002). Adiponectin stimulates glucose utilization and fatty-acid oxidation by activating AMP-activated protein kinase. *Nat. Med.* **8**, 1288-1295.
- Yaspelkis, B. B., Singh, M. K., Krisan, A. D., Collins, D. E., Kwong, C. C., Bernard, J. R. and Crain, A. M.** (2004). Chronic leptin treatment enhances insulin-stimulated glucose disposal in skeletal muscle of high-fat fed rodents. *Life Sci.* **74**, 1801-1816.
- Yoshioka, K., Yoshida, T., Wakabayashi, Y., Nishioka, H. and Kondo, M.** (1989). Effects of exercise training on brown adipose tissue thermogenesis in ovariectomized obese rats. *Endocrinol. Jpn.* **36**, 403-408.
- Zachwieja, J. J., Hendry, S. L., Smith, S. R. and Harris, R. B.** (1997). Voluntary wheel running decreases adipose tissue mass and expression of leptin mRNA in Osborne-Mendel rats. *Diabetes* **46**, 1159-1166.
- Zeng, Q., Isobe, K., Fu, L., Ohkoshi, N., Ohmori, H., Takekoshi, K. and Kawakami, Y.** (2007). Effects of exercise on adiponectin and adiponectin receptor levels in rats. *Life Sci.* **80**, 454-459.
